# Supplementary material for: Metagenomic Study on Chinese Homemade Paocai: The Effects of Raw Materials and Fermentation Periods on the Microbial Ecology and Volatile Components
Source: MDPI journal article supplement (doi:10.3390/foods11010062), 2021-12-28
Supplement: s1 [file s1]

Table S1. Statistics profiles of the metagenome. Note: Raw Reads: the length of raw reads; Clean Reads: the filtered sequence length; Cleaned (%): the content of filtered sequence number; Clean Base represents the number of sequence base; Contigs: sequence of contigs; N50(N90): each contigs sequence is sorted by length, and the length value of each sequence is accumulated one by one from large to small. When the cumulative value first exceeds 50% (90%) of the total length of all sequences, the length value of the sequence is scanned.

Table S2. Content of volatile organic compounds in the two kinds of paocai.

Table S1. Statistics profiles of the metagenome.

| Sample | Raw Reads<br>( $\times 10^6$ ) | Clean Reads<br>( $\times 10^6$ ) | Cleaned(%) | Clean Base<br>( $\times 10^9$ bp) | Contigs | N50 (bp) | N90 (bp) |
|--------|--------------------------------|----------------------------------|------------|-----------------------------------|---------|----------|----------|
| IB1    | 42.26                          | 41.91                            | 99.16      | 6.32                              | 27138   | 9157     | 423      |
| IB2    | 42.03                          | 41.69                            | 99.19      | 6.28                              | 25212   | 9960     | 426      |
| IB3    | 44.59                          | 44.25                            | 99.24      | 6.67                              | 34511   | 5611     | 421      |
| R1B1   | 46.65                          | 46.22                            | 99.08      | 6.97                              | 36039   | 2605     | 542      |
| R1B2   | 43.06                          | 42.69                            | 99.13      | 6.44                              | 36173   | 2659     | 531      |
| R1B3   | 43.00                          | 42.57                            | 99.01      | 6.42                              | 31213   | 2798     | 486      |
| R1R1   | 40.53                          | 40.11                            | 98.98      | 6.05                              | 26233   | 3678     | 485      |
| R1R2   | 40.43                          | 40.04                            | 99.03      | 6.04                              | 32616   | 2082     | 473      |
| R1R3   | 48.26                          | 47.85                            | 99.16      | 7.22                              | 33814   | 2382     | 500      |
| R2B1   | 42.70                          | 42.36                            | 99.19      | 6.39                              | 47483   | 1677     | 432      |
| R2B2   | 51.95                          | 51.33                            | 98.81      | 7.74                              | 38390   | 2402     | 461      |
| R2B3   | 43.26                          | 42.80                            | 98.95      | 6.46                              | 37967   | 2963     | 502      |
| R2R1   | 45.90                          | 45.20                            | 98.48      | 6.82                              | 21492   | 5828     | 484      |
| R2R2   | 42.92                          | 42.48                            | 98.96      | 6.41                              | 23909   | 7873     | 485      |
| R2R3   | 43.43                          | 43.00                            | 99.00      | 6.49                              | 30817   | 2941     | 433      |
| R3B1   | 43.08                          | 42.69                            | 99.09      | 6.44                              | 26594   | 4308     | 461      |
| R3B2   | 43.34                          | 42.95                            | 99.10      | 6.48                              | 30312   | 2528     | 483      |
| R3B3   | 42.83                          | 42.34                            | 98.86      | 6.39                              | 17566   | 10410    | 514      |
| R3R1   | 40.25                          | 39.83                            | 98.96      | 6.01                              | 23925   | 6445     | 497      |
| R3R2   | 43.25                          | 42.77                            | 98.87      | 6.45                              | 23915   | 6899     | 506      |
| R3R3   | 42.75                          | 42.31                            | 98.96      | 6.38                              | 29600   | 1917     | 471      |
| R4B1   | 42.94                          | 42.58                            | 99.17      | 6.42                              | 16191   | 12455    | 522      |
| R4B2   | 53.02                          | 52.56                            | 99.13      | 7.92                              | 27864   | 3302     | 471      |
| R4B3   | 46.99                          | 46.61                            | 99.19      | 7.03                              | 18993   | 11674    | 508      |
| R4R1   | 42.95                          | 42.50                            | 98.95      | 6.41                              | 24220   | 5753     | 486      |
| R4R2   | 42.74                          | 42.35                            | 99.08      | 6.39                              | 17785   | 10812    | 535      |
| R4R3   | 42.40                          | 42.04                            | 99.15      | 6.34                              | 22124   | 5152     | 491      |
| R5B1   | 40.20                          | 39.91                            | 99.27      | 6.02                              | 14612   | 12652    | 573      |
| R5B2   | 42.61                          | 42.17                            | 98.96      | 6.36                              | 18612   | 6290     | 517      |
| R5B3   | 42.27                          | 41.92                            | 99.18      | 6.32                              | 12479   | 15405    | 656      |
| R5R1   | 41.41                          | 41.04                            | 99.11      | 6.19                              | 30022   | 2394     | 486      |
| R5R2   | 41.37                          | 41.02                            | 99.16      | 6.19                              | 22114   | 8563     | 505      |
| R5R3   | 43.16                          | 42.76                            | 99.08      | 6.45                              | 27698   | 2554     | 468      |
| R6B1   | 44.58                          | 44.25                            | 99.25      | 6.67                              | 10599   | 13576    | 842      |
| R6B2   | 42.00                          | 41.54                            | 98.91      | 6.26                              | 9431    | 16491    | 1013     |
| R6B3   | 40.78                          | 40.36                            | 98.98      | 6.08                              | 11751   | 9507     | 782      |
| R6R1   | 47.13                          | 46.48                            | 98.63      | 7.01                              | 14116   | 9279     | 596      |
| R6R2   | 54.45                          | 53.96                            | 99.10      | 8.14                              | 14774   | 12432    | 588      |
| R6R3   | 40.91                          | 40.45                            | 98.87      | 6.10                              | 18051   | 5113     | 519      |

|       |         |         |       |        |        |      |     |
|-------|---------|---------|-------|--------|--------|------|-----|
| Total | 1708.39 | 1691.89 | 99.03 | 255.14 | 966355 | 6680 | 528 |
|-------|---------|---------|-------|--------|--------|------|-----|

---

**Table S2.** Content of volatile organic compounds in the two kinds of paocai. Volatile compounds analyzed by HS-SPME/GC–MS during paocai fermentation.

| Volatile Compounds                       | CAS<br>Number | RT<br>(min) | Concentration (mg/kg) |        |        |        |        |        |        |        |        |        |        |        |
|------------------------------------------|---------------|-------------|-----------------------|--------|--------|--------|--------|--------|--------|--------|--------|--------|--------|--------|
|                                          |               |             | R1R                   | R2R    | R3R    | R4R    | R5R    | R6R    | R1B    | R2B    | R3B    | R4B    | R5B    | R6B    |
| Alcohols                                 |               |             |                       |        |        |        |        |        |        |        |        |        |        |        |
| Carveol                                  | 000099-48-9   | 13.84       | 55.55                 | 48.09  | 67.82  | 83.93  | 61.84  | 64.60  | 60.58  | 36.78  | 89.63  | 65.83  | 78.24  | 55.54  |
| Eucalyptol                               | 000470-82-6   | 14.73       | 143.99                | 170.10 | 199.45 | 140.67 | 176.45 | 169.52 | 118.73 | 116.38 | 194.10 | 212.36 | 177.50 | 192.50 |
| Linalool                                 | 000078-70-6   | 17.47       | 602.84                | 659.73 | 701.66 | 738.00 | 750.57 | 727.98 | 501.60 | 528.80 | 751.11 | 784.18 | 769.56 | 746.12 |
| 2-Phenylethanol                          | 000060-12-8   | 17.74       | 11.07                 | 13.67  | 20.43  | 28.93  | 19.36  | 30.80  | 10.35  | 10.19  | 22.81  | 17.52  | 20.23  | 15.92  |
| 4-Isopropylcyclohexanol                  | 004621-04-9   | 18.34       | 22.58                 | 28.24  | 39.13  | 35.74  | 43.53  | 37.64  | 20.17  | 21.36  | 43.45  | 40.53  | 34.43  | 34.52  |
| β-Terpineol                              | 000138-87-4   | 18.57       | 7.94                  | 10.89  | 8.57   | 6.88   | 10.20  | 7.72   | 5.87   | 5.19   | 7.38   | 8.77   | 6.50   | 6.22   |
| (-)-4-Terpineol                          | 020126-76-5   | 19.53       | 58.06                 | 72.61  | 80.77  | 69.02  | 88.47  | 81.83  | 46.63  | 50.48  | 97.72  | 75.80  | 17.13  | 1.80   |
| α-Terpineol                              | 000098-55-5   | 20.05       | 282.43                | 297.27 | 403.71 | 344.47 | 386.91 | 293.70 | 208.45 | 218.10 | 292.03 | 279.25 | 309.44 | 229.53 |
| (Z)-Carveol                              | 001197-06-4   | 20.86       | 80.11                 | 103.78 | 117.92 | 145.59 | 136.31 | 138.65 | 76.90  | 77.63  | 164.34 | 129.42 | 135.76 | 114.54 |
| Nerol                                    | 000106-25-2   | 21.23       | 59.78                 | 62.61  | 59.76  | 79.76  | 97.15  | 81.22  | 10.74  | 14.57  | 20.82  | 37.01  | 42.41  | 90.97  |
| 4-Isopropylbenzyl Alcohol                | 000536-60-7   | 22.81       | 7.17                  | 10.12  | 13.77  | 14.49  | 12.02  | 10.01  | 6.26   | 4.55   | 11.04  | 8.62   | 9.02   | 7.21   |
| Perillyl alcohol                         | 000536-59-4   | 23.00       | 15.64                 | 21.29  | 22.62  | 28.01  | 24.97  | 20.29  | 14.27  | 10.32  | 28.34  | 18.12  | 18.60  | 14.08  |
| Nerolidol                                | 040716-66-3   | 31.08       | 0.27                  | 0.43   | 0.33   | 0.16   | 0.16   | -      | 0.16   | 0.12   | 0.14   | 0.16   | -      | 0.17   |
| Citronellol                              | 000106-22-9   | 31.44       | 3.51                  | 4.18   | 4.41   | 3.19   | 3.43   | 2.74   | 1.35   | 1.86   | 0.89   | 2.26   | 1.43   | 1.35   |
| Spathulenol                              | 006750-60-3   | 31.61       | -                     | -      | 8.39   | 8.59   | 6.89   | -      | -      | 3.23   | -      | 5.28   | 4.44   | 5.13   |
| γ-Eudesmol                               | 001209-71-8   | 32.99       | 0.93                  | 1.33   | 1.30   | 1.34   | 1.14   | 1.39   | -      | 0.56   | -      | 1.03   | -      | 1.04   |
| α-Cadinol                                | 000481-34-5   | 33.79       | 3.44                  | 3.79   | 3.69   | 3.57   | 4.77   | 3.75   | 1.43   | 1.77   | 1.82   | 2.83   | 2.61   | 3.35   |
| Ketones                                  |               |             |                       |        |        |        |        |        |        |        |        |        |        |        |
| D(+)-Carvone                             | 002244-16-8   | 21.48       | 111.24                | 59.87  | 76.93  | 117.41 | 96.46  | 99.59  | 86.23  | 66.88  | 114.09 | 123.80 | 115.33 | 101.50 |
| 3,5-Dimethyl-2-cyclohexen-1-one          | 001123-09-7   | 22.24       | 15.13                 | 16.37  | 23.21  | 27.37  | 25.46  | 21.26  | 14.31  | 9.35   | 23.57  | 18.23  | 19.15  | 15.40  |
| 2,6,6-Trimethylcyclohepta-2,4-dien-1-one | 000503-93-5   | 24.20       | 5.51                  | 8.64   | 9.45   | 9.23   | 6.94   | -      | 4.40   | 4.25   | -      | 8.29   | 8.97   | 7.25   |

Table S2 (continued)

| Volatile Compounds                              | CAS<br>Number | RT<br>(min) | Concentration (mg/kg) |       |       |       |       |       |       |       |       |       |       |       |
|-------------------------------------------------|---------------|-------------|-----------------------|-------|-------|-------|-------|-------|-------|-------|-------|-------|-------|-------|
|                                                 |               |             | R1R                   | R2R   | R3R   | R4R   | R1R   | R6R   | R1B   | R2B   | R1R   | R4B   | R5B   | R6B   |
| Jasmolin I                                      | 004466-14-2   | 32.03       | -                     | 13.83 | 19.65 | -     | -     | 13.46 | 5.38  | 6.05  | 11.35 | 13.08 | 10.10 | 17.65 |
| Hydrocarbon                                     |               |             |                       |       |       |       |       |       |       |       |       |       |       |       |
| β-Myrcene                                       | 000123-35-3   | 13.43       | 33.42                 | 37.44 | 43.81 | 34.53 | 40.20 | 36.58 | 27.65 | 29.96 | 38.86 | 80.07 | 39.68 | 49.39 |
| α-Terpinene                                     | 000099-86-5   | 14.24       | -                     | 4.01  | 4.08  | -     | -     | 3.63  | 3.29  | 3.74  | -     | -     | 3.70  | 4.07  |
| 4-Carene                                        | 029050-33-7   | 14.25       | 11.03                 | -     | -     | -     | 4.29  | -     | 3.20  | 3.20  | 4.58  | -     | -     | -     |
| (3E)-3,7-Dimethyl-1,3,6-octatriene              | 003779-61-1   | 15.02       | 13.95                 | 28.30 | 18.13 | 13.06 | 18.07 | 15.08 | 8.10  | 8.88  | 19.32 | 22.40 | 15.13 | 14.58 |
| 3,7-Dimethyl-1,3,6-octatriene                   | 013877-91-3   | 15.35       | 20.49                 | 24.39 | 32.40 | 26.23 | 31.67 | 28.70 | 17.71 | 20.18 | 44.49 | 55.25 | 31.45 | 10.16 |
| γ-Terpinene                                     | 000099-85-4   | 15.68       | 1.80                  | 1.94  | 2.19  | 1.92  | 2.72  | 1.83  | 1.55  | 1.96  | 2.39  | 3.43  | 2.17  | 2.28  |
| (4E,6Z)-2,6-Dimethylocta-2,4,6-triene           | 007216-56-0   | 18.01       | 8.47                  | 9.31  | 10.81 | 8.73  | 11.27 | 8.28  | 7.06  | 6.93  | -     | 22.86 | -     | 9.11  |
| Terpinolene                                     | 000586-62-9   | 19.11       | 4.40                  | 5.87  | 5.72  | 5.30  | 7.89  | 7.24  | 2.94  | 3.14  | 4.22  | 6.13  | 4.20  | 3.11  |
| 7-Methylidene-1,2,3,3a,4,5,6,7a-octahydroindene | 040954-37-8   | 22.63       | 0.09                  | 0.17  | 0.14  | -     | -     | -     | -     | -     | -     | 0.34  | -     | -     |
| a-Bornene                                       | 000464-17-5   | 24.41       | -                     | 10.36 | -     | -     | -     | -     | 5.86  | -     | -     | -     | 10.10 | 17.40 |
| 5-methyl-3-prop-1-enylcyclohexene               | 056816-08-1   | 26.23       | -                     | 7.37  | 8.39  | -     | 10.14 | -     | 4.35  | 3.15  | 2.06  | 2.82  | 4.29  | 3.46  |
| (-)-allo-Aromadendrene                          | 025246-27-9   | 28.07       | 0.49                  | 0.86  | 0.99  | 0.48  | 0.76  | 0.96  | 0.83  | 0.35  | 0.21  | 1.31  | 0.26  | 0.42  |
| Cenicriviroc sulfone                            | 000495-60-3   | 29.08       | 2.69                  | 1.78  | 4.25  | 4.91  | 6.08  | 3.34  | 1.27  | 1.44  | 2.40  | 3.27  | 3.83  | 5.43  |
| (S)-β-Bisabolene                                | 000495-61-4   | 29.42       | 1.67                  | 1.59  | 1.96  | 1.64  | 1.73  | 1.36  | 1.04  | 0.54  | 1.06  | 4.17  | 1.13  | 1.34  |
| δ-Cadinene                                      | 000483-76-1   | 29.89       | 3.42                  | 3.97  | 6.51  | 3.83  | 6.69  | 3.37  | 2.18  | 1.35  | 2.42  | 9.60  | 2.57  | 3.47  |
| 1,3,8-Menthatrien                               | 018368-95-1   | 14.09       | 26.65                 | 29.40 | 34.33 | 39.15 | 43.91 | 35.98 | 23.45 | 27.30 | 35.91 | 37.68 | 35.63 | 36.35 |
| 4,α-Dimethylstyrene                             | 001195-32-0   | 16.71       | 30.98                 | 39.20 | 43.13 | 53.61 | 54.75 | 38.90 | 30.05 | 29.98 | 50.96 | 41.40 | 44.60 | 51.21 |
| 2-Methyl-trans-3-hexene                         | 000692-24-0   | 27.73       | 2.20                  | 2.42  | 5.34  | -     | 2.32  | 2.04  | -     | -     | -     | -     | -     | -     |
| α-Curcumene                                     | 000644-30-4   | 28.73       | 3.48                  | -     | 3.13  | 2.66  | 5.90  | 2.66  | 1.29  | 0.00  | 1.95  | 6.10  | 1.82  | 2.65  |

Table S2 (continued)

Table S2 (continued)

| Volatile Compounds      | CAS<br>Number | RT<br>(min) | Concentration (mg/kg) |       |       |       |       |       |      |       |       |       |       |       |
|-------------------------|---------------|-------------|-----------------------|-------|-------|-------|-------|-------|------|-------|-------|-------|-------|-------|
|                         |               |             | R1R                   | R2R   | R3R   | R4R   | R1R   | R6R   | R1B  | R2B   | R1R   | R4B   | R5B   | R6B   |
| Neroloxide              | 001786-08-9   | 18.76       | 8.02                  | 13.16 | 14.50 | 15.33 | 15.79 | 13.98 | 6.86 | 7.02  | 24.43 | 13.02 | 15.98 | 13.44 |
| 2,4-Ditert-butylphenol  | 000096-76-4   | 29.67       | 21.42                 | 17.48 | 10.96 | 12.80 | 13.69 | 14.88 | 6.66 | 11.62 | 8.45  | 11.24 | 6.57  | 11.47 |
| (-)-Caryophyllene oxide | 001139-30-6   | 32.14       | -                     | 3.99  | 3.82  | -     | -     | 3.63  | 3.43 | 3.74  | 4.20  | 4.66  | 3.70  | 4.07  |
